# Supplementary material for: Preclinical PK and PD Studies on 2′-O-Methyl-phosphorothioate RNA Antisense Oligonucleotides in the mdx Mouse Model
Source: PubMed Central journal article supplement — Mol Ther. 2010 Apr 20;18(6):1210–7. doi: 10.1038/mt.2010.72 (PMC2889733; doi:10.1038/mt.2010.72), 2010-04-20
Supplement: mt201072x1.pdf [file mt201072x1.pdf]

**Supplementary Table 1.** Outline of the different experiments

| <b>Study</b> | <b>Mouse model(s)</b> | <b>Dose</b>   | <b>Delivery</b> | <b>Frequency</b> | <b>Results</b> |
|--------------|-----------------------|---------------|-----------------|------------------|----------------|
| 1            | Mdx and wt            | 50 mg/kg      | IV              | Once             | Fig 1A         |
| 2            | Mdx and wt            | 20 $\mu$ g    | IM              | 2 times          | Fig 1B         |
| 3            | Mdx                   | 100 mg/kg     | IV              | 3 times          | Fig 2          |
| 4            | Mdx                   | 12.5-50 mg/kg | IM, IV, IP, SC  | Once             | Fig 3A         |
| 5            | Mdx                   | 250 mg/kg     | IV, IP, SC      | 5 times          | Fig 3BCD       |
| 6            | Mdx                   | 25-100 mg/kg  | SC              | 8 or 16 times    | Fig 4, Fig 5   |
